# Supplementary material
Source: PubMed Central journal article supplement (PMC5634710)

## SUPPORTING ONLINE MATERIAL

### Dye Diffusion at Surfaces: Charge Matters

Charlisa R. Daniels, Carmen Reznik, Christy F. Landes<sup>\*‡</sup>

<sup>\*</sup> Department of Chemistry, Rice University, Houston, Texas 77005

#### CONTENTS:

#### Page

|                                                   |   |
|---------------------------------------------------|---|
| I. AUTOCORRELATION CURVES FOR FEATURED DYES ..... | 2 |
| Figure S1: Rhodamine 6G.....                      | 2 |
| Figure S2: Alexa 555.....                         | 2 |
| II. SINGLE MOLECULE BLIP FREQUENCY ANALYSIS ..... | 2 |
| Figure S3: Analysis in acidic conditions .....    | 2 |

## I. AUTOCORRELATION CURVES:

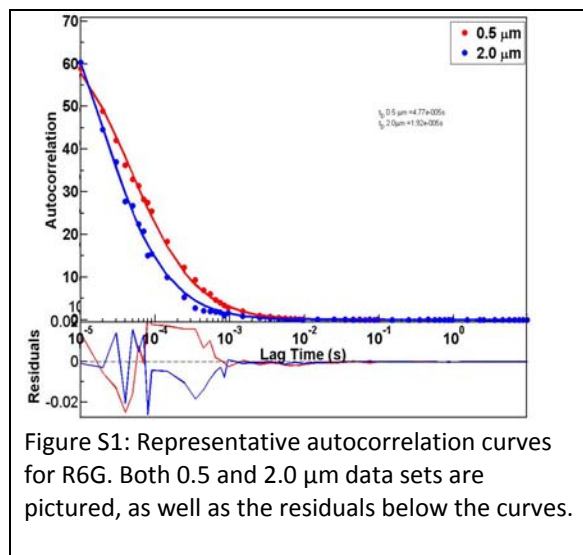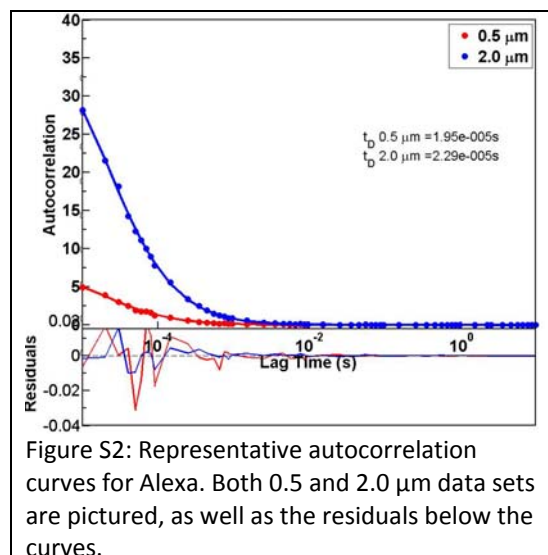

It is important to note that, although there is an inverse relationship between the concentration and the autocorrelation amplitude, other factors such as dye photophysics, brightness, and scattering as a function of depth within the sample complicate the observed relationship, as shown in Figures S1 and S2.

## II. SINGLE MOLECULE BLIP FREQUENCY ANALYSIS:

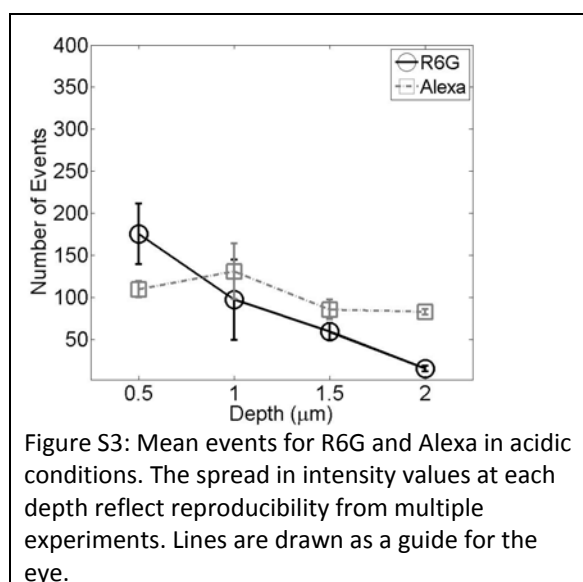

Supplement: NIHMS908234-supplement-Dye_Diffusion_figures.pdf [file NIHMS908234-supplement-Dye_Diffusion_figures.pdf]
